# Supplementary material for: The Risk of Hip Fracture Due to Mirtazapine Exposure When Switching Antidepressants or Using Other Antidepressants as Add-On Therapy
Source: Springer Nature journal article supplement (doi:10.1007/s40801-017-0120-y), 2017-09-22
Supplement: MOESM1 [file 24440556]

## **Title Page**

**Article Title:** The risk of hip fracture due to mirtazapine exposure when switching antidepressants or using other antidepressants as add-on therapy

**Journal Name:** Drugs – Real World Outcomes

**Authors:** Michael J Leach<sup>1,2,3</sup>, Nicole L Pratt<sup>1</sup>, Elizabeth E Roughead<sup>1</sup>.

1. Quality Use of Medicines and Pharmacy Research Centre (QUMPRC), Sansom Institute, School of Pharmacy and Medical Sciences, University of South Australia, GPO Box 2471, Adelaide, 5001 SA, Australia.

2. Loddon Mallee Integrated Cancer Service (LMICS), Bendigo Health Care Group, 100 Barnard Street, Bendigo, 3550 VIC, Australia.

3. School of Rural Health, Monash University, 26 Mercy Street, Bendigo, 3550 VIC, Australia.

**Corresponding author's email address:** michael.leach@mymail.unisa.edu.au

## **Appendix 1: Anatomical therapeutic chemical (ATC) codes used to define medicine groups**

| <b>Medicine Groups</b>           | <b>Anatomical Therapeutic Chemical (ATC) Code(s)</b>         |
|----------------------------------|--------------------------------------------------------------|
| Opioids                          | N02A                                                         |
| Antiepileptics                   | N03A except N02AE01 (clonazepam)                             |
| Anti-Parkinson medicines         | N04                                                          |
| Antipsychotics                   | N05A except N05AN01 (lithium) and N05AB04 (prochlorperazine) |
| Benzodiazepines                  | N03AE, N05BA and N05CD                                       |
| Benzodiazepine-related medicines | N05CF                                                        |
| TCAs                             | N06AA                                                        |
| SSRIs                            | N06AB                                                        |
| Mirtazapine                      | N06AX11                                                      |
| SNRIs                            | N06AX16, N06AX21 and N06AX23                                 |
| Anticholinesterases              | N06DA                                                        |

TCA – tricyclic antidepressant, SSRI – selective serotonin reuptake inhibitor, SNRI – serotonin and noradrenaline reuptake inhibitor

**Appendix 2: Individual products involved in the new SSRI-continuous mirtazapine combination**

| <b>Hip Fracture</b> | <b>New SSRI</b>   | <b>Latest Mirtazapine*</b> | <b>Prior Mirtazapine#</b> | <b>N</b> |
|---------------------|-------------------|----------------------------|---------------------------|----------|
| Yes                 | Escitalopram 10mg | Mirtazapine 45 mg          | Mirtazapine 30 mg         | 1        |
| Yes                 | Escitalopram 10mg | Mirtazapine 30 mg          | Mirtazapine 30 mg         | 3        |
| Yes                 | Fluvoxamine 50mg  | Mirtazapine 30 mg          | Mirtazapine 30 mg         | 1        |
| Yes                 | Sertraline 50 mg  | Mirtazapine 30 mg          | Mirtazapine 15 mg         | 1        |
| Yes                 | Citalopram 10mg   | Mirtazapine 30 mg          | Mirtazapine 15 mg         | 1        |
| No                  | Sertraline 50mg   | Mirtazapine 30 mg          | Mirtazapine 30 mg         | 1        |
| No                  | Sertraline 50mg   | Mirtazapine 30 mg          | Mirtazapine 30 mg         | 1        |

SSRI – selective serotonin reuptake inhibitor

\* Immediately before hip fracture

# Immediately before the latest mirtazapine prescription and the new SSRI prescription

**Appendix 3: Individual products involved in the new TCA-continuous mirtazapine combination**

| <b>Hip Fracture</b> | <b>New TCA</b>      | <b>Latest Mirtazapine*</b> | <b>Prior Mirtazapine#</b> | <b>N</b> |
|---------------------|---------------------|----------------------------|---------------------------|----------|
| Yes                 | Nortriptyline 25 mg | Mirtazapine 45 mg          | Mirtazapine 30 mg         | 1        |
| Yes                 | Amitriptyline 10 mg | Mirtazapine 30 mg          | Mirtazapine 15 mg         | 3        |
| No                  | Amitriptyline 25 mg | Mirtazapine 30 mg          | Mirtazapine 30 mg         | 1        |

TCA – tricyclic antidepressant

\* Immediately before hip fracture

# Immediately before the latest mirtazapine prescription and the new SSRI prescription
